# Supplementary material for: Precision subclassification of type 2 diabetes: a systematic review
Source: Springer Nature journal article supplement (doi:10.1038/s43856-023-00360-3), 2023-10-05
Supplement: MOESM1 [file 43856_2023_360_MOESM1_ESM.pdf]

**Supplementary Table 1: PICO framework used in systematic review**

| <b>Criteria</b> | <b>Determinant</b>                                                                                                                                                                                                                                                                                                           |
|-----------------|------------------------------------------------------------------------------------------------------------------------------------------------------------------------------------------------------------------------------------------------------------------------------------------------------------------------------|
| Population      | Studies reporting on patients with incident or prevalent type 2 diabetes                                                                                                                                                                                                                                                     |
| Exposure        | <p>Any approach taken to classifying people with type 2 diabetes using search terms including “classification”, “subtype”, “category”, “phenotype”, “precision medicine”, “heterogeneity” (see supp table).</p> <p>There were no restrictions on the approach used e.g. biomarker, anthropometry, imaging and any others</p> |
| Comparison      | Subgroups of type 2 diabetes identified following classification using the exposure were compared                                                                                                                                                                                                                            |
| Outcome         | Any outcome in the groups were accepted e.g phenotype data, glycaemia, microvascular complications, macrovascular complications, mortality and others                                                                                                                                                                        |
| Study Designs   | All designs were accepted                                                                                                                                                                                                                                                                                                    |

## Supplementary methods

Question 1 Search Terms (Simple approaches to classification)

#1

"Diabetes Mellitus, Type 2"[Mesh]  
=154385

#2

type 2 diabetes[Title/Abstract] OR niddm[Title/Abstract] OR t2dm[Title/Abstract] OR  
t2d[Title/Abstract] OR "noninsulin dependent diabetes"[Title/Abstract] OR "non insulin dependent  
diabetes"[Title/Abstract] OR "type 2"[Title/Abstract] OR "type ii"[Title/Abstract] OR  
type2[Title/Abstract] OR typeii[Title/Abstract] OR adult-onset diabetes[Title/Abstract] OR  
prediabetic[Title/Abstract] OR pre-diabetic[Title/Abstract] OR Non-insulin dependent diabetes  
mellitus  
=378950

#3

#1 OR #2  
=378950

#4

"Classification"[Mesh] OR "classification" [Subheading]  
=753381

#5

classificat\*[Title/Abstract] OR sub classificat\*[Title/Abstract] OR subclassificat\*[Title/Abstract] OR  
subgroup\*[Title/Abstract] OR "sub-group\*" OR subtype\*[Title/Abstract] OR "glucose response  
curve"[Title/Abstract] OR "body shape index"[Title/Abstract] OR "fat evaluation"[Title/Abstract] OR  
"fasting insulin resistance index"[Title/Abstract] OR metabolic basis[Title/Abstract] OR immunologic  
basis[Title/Abstract] OR immunological basis[Title/Abstract]  
=850738

#6

#4 OR #5  
=1494817

#7

((("Precision Medicine"[Mesh]) OR "Genetic Heterogeneity"[Mesh]) OR "Phenotype"[Mesh]) OR  
"Blood Glucose"[Mesh]  
=535079

#8

"precision medicine"[Title/Abstract] OR heterogeneity[Title/Abstract] OR variability[Title/Abstract] OR phenotyp\*[Title/Abstract] OR pattern\*[Title/Abstract] OR severity[Title/Abstract] OR feature\*[Title/Abstract] OR characteristic\*[Title/Abstract] OR predict\*[Title/Abstract] OR stage\*[Title/Abstract] OR glycemia[Title/Abstract] OR glycaemia[Title/Abstract] OR "personalised medicine"[Title/Abstract] OR "personalised medicine"[Title/Abstract] OR forecast\*[Title/Abstract] OR determinant\*[Title/Abstract]  
=7227358

#9  
#7 OR #8  
=7484521

#10  
"Medical History Taking"[Mesh]  
=22396

#11  
family history[Title/Abstract] OR relative[Title/Abstract]  
=993615

#12  
#10 OR #11  
=1013777

#13  
#9 OR #12  
=8116688

#14  
((((((((((((("Insulin-Secreting Cells"[Mesh]) OR "Islets of Langerhans"[Mesh]) OR "C-Peptide"[Mesh]) OR "Glucose Tolerance Test"[Mesh]) OR "Glucose Clamp Technique"[Mesh]) OR "Biomarkers"[Mesh]) OR ( "Body Mass Index"[Mesh] OR "Obesity"[Mesh] OR "Overweight"[Mesh] )) OR "Insulin Resistance"[Mesh]) OR "Body Weight"[Mesh]) OR "Glycemic Index"[Mesh]) OR "Metabolic Syndrome"[Mesh]) OR "Lipids"[Mesh]) OR "Cholesterol"[Mesh]) OR "Dyslipidemias"[Mesh]) OR "Body Fat Distribution"[Mesh]) OR "Intra-Abdominal Fat"[Mesh]  
=2638388

#15  
Beta cell\*[Title/Abstract] OR betacell\*[Title/Abstract] OR beta-cell\*[Title/Abstract] OR beta cell dysfunction[Title/Abstract] OR beta cell function[Title/Abstract] OR insulin secretion[Title/Abstract] OR c-peptide[Title/Abstract] OR "first phase"[Title/Abstract] OR "glucose tolerance test"[Title/Abstract] OR ogtt[Title/Abstract] OR ivgtt[Title/Abstract] OR clamp[Title/Abstract] OR biomarker\*[Title/Abstract] OR biological marker\*[Title/Abstract] OR "body mass index"[Title/Abstract] OR bmi[Title/Abstract] OR over weight[Title/Abstract] OR overweight[Title/Abstract] OR obesity[Title/Abstract] OR adiposity[Title/Abstract] OR "insulin resistance"[Title/Abstract] OR homa[Title/Abstract] OR homeostasis model assessment[Title/Abstract] OR weight[Title/Abstract] OR score[Title/Abstract] OR

index[Title/Abstract] OR metabolic syndrome[Title/Abstract] OR excess fat mass[Title/Abstract] OR lipid\*[Title/Abstract] OR triglycerid\*[Title/Abstract] OR cholesterol[Title/Abstract] OR dyslipidemia[Title/Abstract] OR body fat distribution[Title/Abstract] OR bodyfat distribution[Title/Abstract] OR ketosis[Title/Abstract] OR atypical[Title/Abstract] OR "age at onset"[Title/Abstract] OR "age at diagnosis"[Title/Abstract] OR ketoacidosis[Title/Abstract]  
=3645559

#16  
#14 OR #15  
=5129710

#17  
#3 AND #6 AND #13 AND #17  
=7208

#18  
#17 Filters:Humans  
=5993

#19  
(review[Publication Type] OR "systematic review"[Publication Type] OR (editorial[Title/Abstract] OR review[Title/Abstract]))  
=2902309

#20  
#18 NOT #19  
=**4825 references**

#### Question 2 Search Terms (Complex approaches to classification)

#1  
Diabetes mellitus/classification[MeSH terms] OR diabetes mellitus type 2/classification[Mesh Terms] OR diabetes mellitus type 2/epidemiology[MeSH Terms] OR diabetes mellitus type 2/physiopathology[MeSH Terms] OR diabetes mellitus type 2[MeSH Terms] OR diabetes complications[MeSH Terms] OR Prediabetes[MeSH Terms]  
=280913

#2  
"Diabetes mellitus, type 2"[Title/Abstract] OR T2D[Title/Abstract] OR "diabetes mellitus type-2" prediabetes[Title/Abstract] OR pre-diabetes IGT[Title/Abstract] OR IFC[Title/Abstract] OR type 2 diabetes[Title/Abstract] OR cluster based diabetes[Title/Abstract] OR cluster-based diabetes[Title/Abstract] OR "adult onset diabetes"[Title/Abstract] OR adult-onset diabetes[Title/Abstract] Filters: Humans  
=116423

#3  
"adult-onset diabetes subgroups"

=5716

#4

#1 OR #2 OR #3

=302899

#5

(((((("Phenotype"[Mesh]) OR "Body Mass Index"[Mesh]) OR "Autoantibodies"[Mesh]) OR "Blood Glucose"[Mesh]) OR "Glycated Hemoglobin A"[Mesh]) OR "Hypoglycemic Agents"[Mesh]

=809305

#6

(((((("Genetic Loci"[Mesh]) OR "Genetic Markers"[Mesh]) OR "Genetic Predisposition to Disease"[Mesh]) OR "Genome-Wide Association Study"[Mesh]) OR "Bayes Theorem"[Mesh]) OR "Founder Effect"[Mesh]) OR "Multigene Family"[Mesh]

=366199

#7

classification[Title/Abstract] OR phenotyp\*[Title/Abstract] OR subphenotyp\*[Title/Abstract] OR subtype\*[Title/Abstract] OR "clinical type\*[Title/Abstract] OR autoantibod\*[Title/Abstract] OR "blood glucose"[Title/Abstract] OR "glycated hemoglobin A"[Title/Abstract] OR "genetic loci"[Title/Abstract] OR "genetic predisposition to disease"[Title/Abstract] OR "genome-wide association study"[Title/Abstract] OR "founder effect\*[Title/Abstract] OR "bayes theorem"[Title/Abstract] OR HOMA\*[Title/Abstract] OR subgroup\*[Title/Abstract] OR HbA1c[Title/Abstract] OR A1C[Title/Abstract]

=1681470

#8

#5 OR #6 OR #7

=2391509

#9

((("Cluster Analysis"[Mesh]) OR ( "Supervised Machine Learning"[Mesh] OR "Unsupervised Machine Learning"[Mesh] OR "Machine Learning"[Mesh] )) OR "Artificial Intelligence"[Mesh]) OR "Monitoring, Physiologic"[Mesh]

=398710

#10

cluster analysis[Title/Abstract] OR machine learning[Title/Abstract] OR reinforcement learning[Title/Abstract] OR deep learning[Title/Abstract] OR CNN[Title/Abstract] OR "convolutional neural network"[Title/Abstract] OR "data driven cluster\*[Title/Abstract] OR "data-driven cluster\*[Title/Abstract] OR "physiologic monitor\*[Title/Abstract] OR "artificial intelligence"[Title/Abstract] OR AI[Title/Abstract] OR clusters[Title/Abstract] OR subgroup\*[Title] OR subtype\*[Title]

=365087

#11

#9 OR #10

=689538

#12

#4 AND #8 AND #11

=5986
